# Supplementary material for: Facile fabrication of a superhydrophilic–superhydrophobic patterned surface by inkjet printing a sacrificial layer on a superhydrophilic surface
Source: Royal Society of Chemistry journal article supplement (doi:10.1039/c6ra02170k), 2016-01-01
Supplement: c6ra02170k1.pdf [file c6ra02170k1.pdf]

Supporting information

## Facile fabrication of superhydrophilic-superhydrophobic patterned surface by inkjet printing sacrificial layer on superhydrophilic surface

Jiazhen Sun,<sup>a</sup> Bin Bao,<sup>a</sup> Jieke Jiang,<sup>b</sup> Min He,<sup>b</sup> Xingye Zhang,<sup>b</sup> and Yanlin Song<sup>\*ab</sup>

a. School of Chemistry and Environment, Beihang University, Beijing 100190, China

b. Key Laboratory of Green Printing, Institute of Chemistry, Chinese Academy of Sciences, Beijing Engineering Research Center of Nanomaterials for Green Printing Technology, Beijing National Laboratory for Molecular Sciences, Beijing 100190, China

\* E-mail: ylsong@iccas.ac.cn

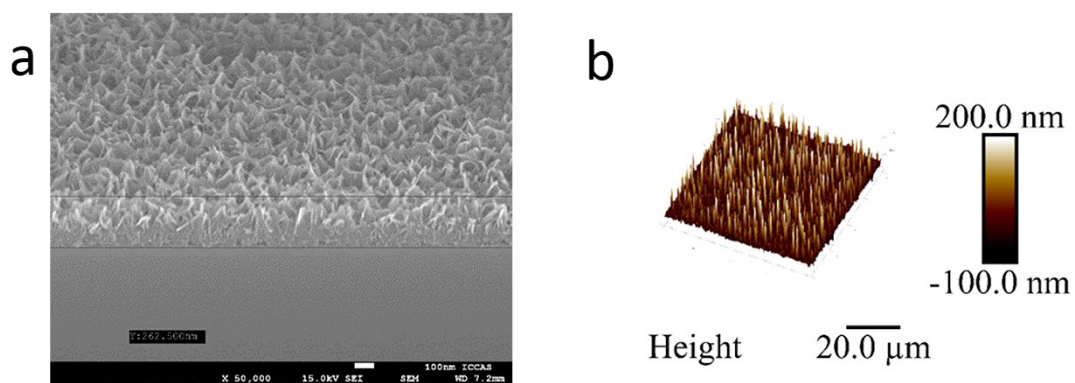

**Figure S1.** a) SEM image of the cross section of the superhydrophilic porous alumina substrate. b) AFM image of the superhydrophilic porous alumina substrate.

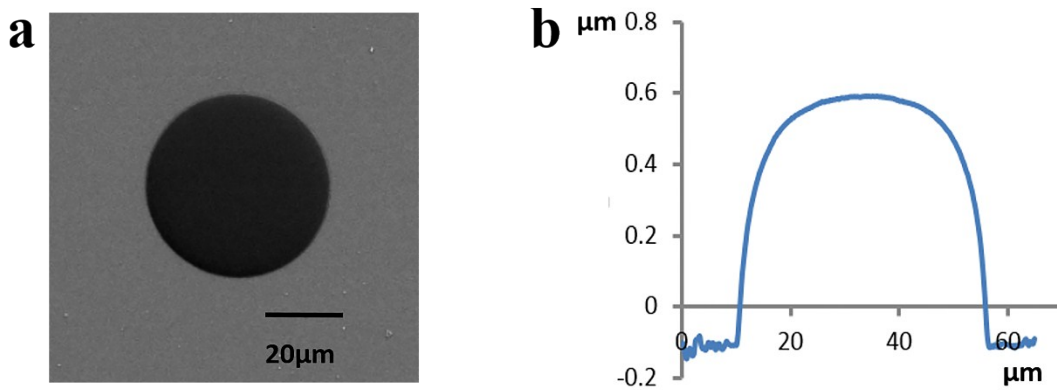

**Figure S2.** a) SEM image of one printed dot with 30% ink concentration. b) Height profile image of the printed dot.

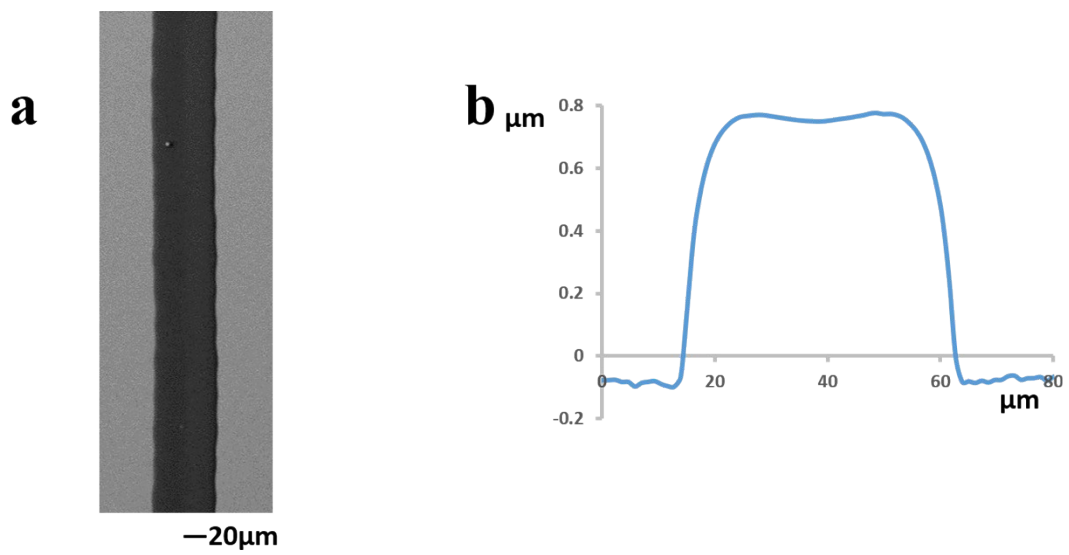

**Figure S3.** a) SEM image of coalesced line corresponding in Figure 4a. b) Height profile image of the coalesced line.

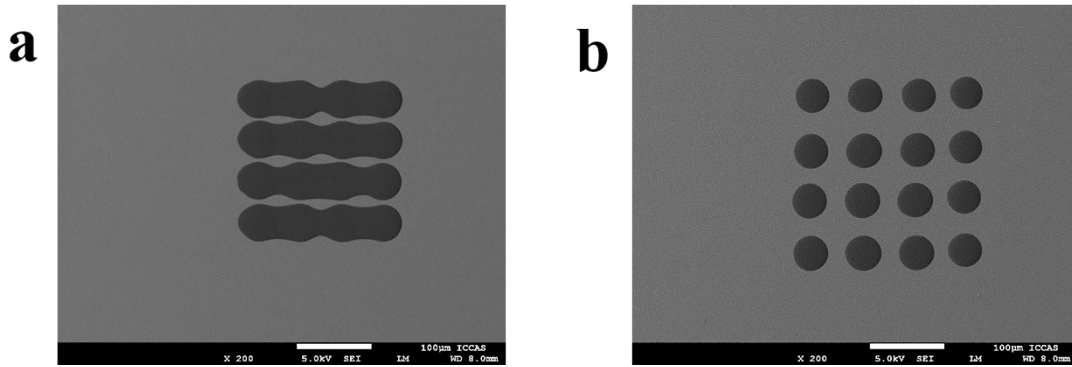

**Figure S4.** a) SEM image of the printed pattern with 70  $\mu\text{m}$  droplet distance. b) SEM image of the printed pattern with 80  $\mu\text{m}$  droplet distance.

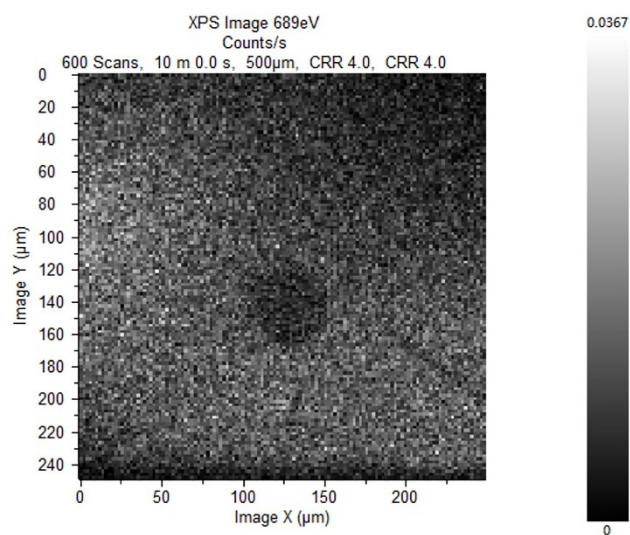

**Figure S5.** XPS observation of printed dot surface after modifying with the FAS and removing the printed deposit.
